# Supplementary material for: Biologically-Directed Modeling Reflects Cytolytic Clearance of SIV-Infected Cells In Vivo in Macaques
Source: PubMed Central journal article supplement (PMC3441463; doi:10.1371/journal.pone.0044778), 2012-09-13
Supplement: pone.0044778.s001.pdf [file pone.0044778.s001.pdf]

| Parameter Set | ActCD4life (Days) | $R_0$ | Eclipse (Days) | $\alpha$ and $K$ ( $\times 10^9$ ) | Viremia Rise After CD8 Depletion | Decay Rate Undepleted | Decay Rate CD8-Depleted | % $\Delta$ |
|---------------|-------------------|-------|----------------|------------------------------------|----------------------------------|-----------------------|-------------------------|------------|
| 1             | 4                 | 8     | 1              | 1                                  | 1.85                             | -1.42                 | -1.51                   | 6.7        |
| 2             | 4                 | 8     | 1              | 5                                  | 2.62                             | -1.40                 | -1.51                   | 8.3        |
| 3             | 4                 | 8     | 1              | 10                                 | 2.96                             | -1.39                 | -1.51                   | 8.6        |
| 4             | 4                 | 8     | 2              | 1                                  | 1.60                             | -1.44                 | -1.51                   | 5.1        |
| 5             | 4                 | 8     | 2              | 5                                  | 2.37                             | -1.42                 | -1.51                   | 6.6        |
| 6             | 4                 | 8     | 2              | 10                                 | 2.71                             | -1.41                 | -1.51                   | 6.9        |
| 7             | 4                 | 8     | 2.5            | 1                                  | 1.46                             | -1.44                 | -1.51                   | 4.4        |
| 8             | 4                 | 8     | 2.5            | 5                                  | 2.23                             | -1.42                 | -1.51                   | 6.1        |
| 9             | 4                 | 8     | 2.5            | 10                                 | 2.57                             | -1.42                 | -1.51                   | 6.5        |
| 10            | 4                 | 10    | 1              | 1                                  | 1.85                             | -1.42                 | -1.51                   | 6.9        |
| 11            | 4                 | 10    | 1              | 5                                  | 2.61                             | -1.39                 | -1.51                   | 8.7        |
| 12            | 4                 | 10    | 1              | 10                                 | 2.95                             | -1.39                 | -1.51                   | 9.0        |
| 13            | 4                 | 10    | 2              | 1                                  | 1.61                             | -1.44                 | -1.51                   | 5.2        |
| 14            | 4                 | 10    | 2              | 5                                  | 2.36                             | -1.41                 | -1.51                   | 6.8        |
| 15            | 4                 | 10    | 2              | 10                                 | 2.70                             | -1.42                 | -1.51                   | 6.6        |
| 16            | 4                 | 10    | 2.5            | 1                                  | 1.46                             | -1.44                 | -1.51                   | 4.5        |
| 17            | 4                 | 10    | 2.5            | 5                                  | 2.22                             | -1.42                 | -1.51                   | 6.3        |
| 18            | 4                 | 10    | 2.5            | 10                                 |                                  |                       |                         |            |
| 19            | 4                 | 15    | 1              | 1                                  | 1.85                             | -1.42                 | -1.51                   | 7.2        |
| 20            | 4                 | 15    | 1              | 5                                  | 2.59                             | -1.41                 | -1.51                   | 9.2        |
| 21            | 4                 | 15    | 1              | 10                                 |                                  |                       |                         |            |
| 22            | 4                 | 15    | 2              | 1                                  | 1.61                             | -1.43                 | -1.51                   | 5.3        |
| 23            | 4                 | 15    | 2              | 5                                  | 2.36                             | -1.41                 | -1.51                   | 7.3        |
| 24            | 4                 | 15    | 2              | 10                                 |                                  |                       |                         |            |
| 25            | 4                 | 15    | 2.5            | 1                                  |                                  |                       |                         |            |
| 26            | 4                 | 15    | 2.5            | 5                                  |                                  |                       |                         |            |
| 27            | 4                 | 15    | 2.5            | 10                                 |                                  |                       |                         |            |
| 28            | 7                 | 8     | 1              | 1                                  | 1.93                             | -0.56                 | -0.65                   | 17.1       |
| 29            | 7                 | 8     | 1              | 5                                  | 2.70                             | -0.54                 | -0.65                   | 20.2       |
| 30            | 7                 | 8     | 1              | 10                                 | 3.04                             | -0.54                 | -0.65                   | 20.7       |
| 31            | 7                 | 8     | 2              | 1                                  | 1.82                             | -0.56                 | -0.65                   | 16.6       |
| 32            | 7                 | 8     | 2              | 5                                  | 2.58                             | -0.54                 | -0.65                   | 19.9       |
| 33            | 7                 | 8     | 2              | 10                                 | 2.92                             | -0.54                 | -0.65                   | 20.4       |
| 34            | 7                 | 8     | 2.5            | 1                                  | 1.73                             | -0.56                 | -0.65                   | 16.0       |
| 35            | 7                 | 8     | 2.5            | 5                                  | 2.49                             | -0.54                 | -0.65                   | 19.5       |
| 36            | 7                 | 8     | 2.5            | 10                                 | 2.83                             | -0.54                 | -0.65                   | 20.1       |
| 37            | 7                 | 10    | 1              | 1                                  | 1.94                             | -0.55                 | -0.65                   | 17.7       |
| 38            | 7                 | 10    | 1              | 5                                  | 2.69                             | -0.54                 | -0.65                   | 21.2       |
| 39            | 7                 | 10    | 1              | 10                                 | 3.03                             | -0.54                 | -0.65                   | 21.7       |
| 40            | 7                 | 10    | 2              | 1                                  | 1.82                             | -0.55                 | -0.65                   | 17.1       |
| 41            | 7                 | 10    | 2              | 5                                  | 2.57                             | -0.54                 | -0.65                   | 20.8       |
| 42            | 7                 | 10    | 2              | 10                                 | 2.92                             | -0.54                 | -0.65                   | 21.4       |
| 43            | 7                 | 10    | 2.5            | 1                                  | 1.73                             | -0.56                 | -0.65                   | 16.4       |
| 44            | 7                 | 10    | 2.5            | 5                                  | 2.48                             | -0.54                 | -0.65                   | 20.4       |
| 45            | 7                 | 10    | 2.5            | 10                                 | 2.82                             | -0.53                 | -0.65                   | 21.1       |
| 46            | 7                 | 15    | 1              | 1                                  | 1.94                             | -0.55                 | -0.65                   | 18.7       |
| 47            | 7                 | 15    | 1              | 5                                  | 2.68                             | -0.53                 | -0.65                   | 22.8       |
| 48            | 7                 | 15    | 1              | 10                                 | 3.02                             | -0.53                 | -0.65                   | 23.6       |
| 49            | 7                 | 15    | 2              | 1                                  | 1.83                             | -0.55                 | -0.65                   | 18.0       |
| 50            | 7                 | 15    | 2              | 5                                  | 2.57                             | -0.53                 | -0.65                   | 22.4       |
| 51            | 7                 | 15    | 2              | 10                                 | 2.90                             | -0.53                 | -0.65                   | 23.3       |
| 52            | 7                 | 15    | 2.5            | 1                                  | 1.74                             | -0.55                 | -0.65                   | 17.2       |
| 53            | 7                 | 15    | 2.5            | 5                                  | 2.48                             | -0.53                 | -0.65                   | 21.9       |
| 54            | 7                 | 15    | 2.5            | 10                                 | 2.81                             | -0.53                 | -0.65                   | 22.9       |
| 55            | 15                | 8     | 1              | 1                                  | 1.67                             | -0.12                 | -0.14                   | 17.4       |
| 56            | 15                | 8     | 1              | 5                                  | 2.29                             | -0.12                 | -0.13                   | 10.8       |
| 57            | 15                | 8     | 1              | 10                                 | 2.57                             | -0.12                 | -0.13                   | 8.5        |
| 58            | 15                | 8     | 2              | 1                                  | 1.65                             | -0.12                 | -0.14                   | 18.0       |
| 59            | 15                | 8     | 2              | 5                                  | 2.25                             | -0.12                 | -0.13                   | 9.7        |
| 60            | 15                | 8     | 2              | 10                                 | 2.51                             | -0.12                 | -0.13                   | 6.9        |
| 61            | 15                | 8     | 2.5            | 1                                  | 1.63                             | -0.11                 | -0.14                   | 18.8       |
| 62            | 15                | 8     | 2.5            | 5                                  | 2.21                             | -0.12                 | -0.13                   | 9.0        |
| 63            | 15                | 8     | 2.5            | 10                                 | 2.46                             | -0.12                 | -0.13                   | 5.8        |
| 64            | 15                | 10    | 1              | 1                                  | 1.69                             | -0.11                 | -0.14                   | 19.1       |
| 65            | 15                | 10    | 1              | 5                                  | 2.32                             | -0.12                 | -0.13                   | 12.0       |
| 66            | 15                | 10    | 1              | 10                                 | 2.60                             | -0.12                 | -0.13                   | 9.5        |
| 67            | 15                | 10    | 2              | 1                                  | 1.67                             | -0.11                 | -0.14                   | 19.6       |
| 68            | 15                | 10    | 2              | 5                                  | 2.28                             | -0.12                 | -0.13                   | 10.7       |
| 69            | 15                | 10    | 2              | 10                                 | 2.55                             | -0.12                 | -0.13                   | 7.6        |
| 70            | 15                | 10    | 2.5            | 1                                  | 1.65                             | -0.11                 | -0.14                   | 20.3       |
| 71            | 15                | 10    | 2.5            | 5                                  | 2.24                             | -0.12                 | -0.13                   | 10.0       |
| 72            | 15                | 10    | 2.5            | 10                                 | 2.50                             | -0.12                 | -0.13                   | 6.4        |
| 73            | 15                | 15    | 1              | 1                                  | 1.71                             | -0.11                 | -0.14                   | 21.9       |
| 74            | 15                | 15    | 1              | 5                                  | 2.35                             | -0.12                 | -0.14                   | 14.0       |
| 75            | 15                | 15    | 1              | 10                                 | 2.64                             | -0.12                 | -0.13                   | 10.9       |
| 76            | 15                | 15    | 2              | 1                                  | 1.70                             | -0.11                 | -0.14                   | 22.3       |
| 77            | 15                | 15    | 2              | 5                                  | 2.31                             | -0.12                 | -0.13                   | 12.6       |
| 78            | 15                | 15    | 2              | 10                                 | 2.60                             | -0.12                 | -0.13                   | 8.8        |
| 79            | 15                | 15    | 2.5            | 1                                  | 1.68                             | -0.11                 | -0.14                   | 22.9       |
| 80            | 15                | 15    | 2.5            | 5                                  | 2.28                             | -0.12                 | -0.13                   | 11.8       |
| 81            | 15                | 15    | 2.5            | 10                                 | 2.55                             | -0.12                 | -0.13                   | 7.4        |
