# Supplementary material for: Biologically-Directed Modeling Reflects Cytolytic Clearance of SIV-Infected Cells In Vivo in Macaques
Source: PubMed Central journal article supplement (PMC3441463; doi:10.1371/journal.pone.0044778), 2012-09-13
Supplement: pone.0044778.s002.pdf [file pone.0044778.s002.pdf]

| Parameter Set | ActCD4life (Days) | R <sub>0</sub> | Eclipse (Days) | α and K (x 10 <sup>9</sup> ) | Viremia Rise After CD8 Depletion | Decay Rate Undepleted | Decay Rate CD8-Depleted | % Δ  |
|---------------|-------------------|----------------|----------------|------------------------------|----------------------------------|-----------------------|-------------------------|------|
| 1             | 4                 | 8              | 1              | 1                            |                                  |                       |                         |      |
| 2             | 4                 | 8              | 1              | 5                            | 1.07                             | -3.50                 | -3.68                   | 5.2  |
| 3             | 4                 | 8              | 1              | 10                           | 1.45                             | -3.48                 | -3.68                   | 5.9  |
| 4             | 4                 | 8              | 2              | 1                            |                                  |                       |                         |      |
| 5             | 4                 | 8              | 2              | 5                            | 0.78                             | -3.57                 | -3.68                   | 3.2  |
| 6             | 4                 | 8              | 2              | 10                           | 1.16                             | -3.54                 | -3.68                   | 3.9  |
| 7             | 4                 | 8              | 2.5            | 1                            |                                  |                       |                         |      |
| 8             | 4                 | 8              | 2.5            | 5                            | 0.63                             | -3.59                 | -3.68                   | 2.4  |
| 9             | 4                 | 8              | 2.5            | 10                           | 0.97                             | -3.56                 | -3.68                   | 3.2  |
| 10            | 4                 | 10             | 1              | 1                            |                                  |                       |                         |      |
| 11            | 4                 | 10             | 1              | 5                            | 1.02                             | -3.50                 | -3.69                   | 5.2  |
| 12            | 4                 | 10             | 1              | 10                           | 1.42                             | -3.47                 | -3.68                   | 6.1  |
| 13            | 4                 | 10             | 2              | 1                            |                                  |                       |                         |      |
| 14            | 4                 | 10             | 2              | 5                            | 0.78                             | -3.57                 | -3.68                   | 3.1  |
| 15            | 4                 | 10             | 2              | 10                           | 1.14                             | -3.54                 | -3.68                   | 4.0  |
| 16            | 4                 | 10             | 2.5            | 1                            |                                  |                       |                         |      |
| 17            | 4                 | 10             | 2.5            | 5                            | 0.62                             | -3.60                 | -3.68                   | 2.2  |
| 18            | 4                 | 10             | 2.5            | 10                           | 0.96                             | -3.57                 | -3.68                   | 3.2  |
| 19            | 4                 | 15             | 1              | 1                            |                                  |                       |                         |      |
| 20            | 4                 | 15             | 1              | 5                            | 1.05                             | -3.52                 | -3.68                   | 4.8  |
| 21            | 4                 | 15             | 1              | 10                           | 1.38                             | -3.47                 | -3.68                   | 6.3  |
| 22            | 4                 | 15             | 2              | 1                            |                                  |                       |                         |      |
| 23            | 4                 | 15             | 2              | 5                            | 0.77                             | -3.58                 | -3.68                   | 2.8  |
| 24            | 4                 | 15             | 2              | 10                           | 1.10                             | -3.54                 | -3.68                   | 3.9  |
| 25            | 4                 | 15             | 2.5            | 1                            |                                  |                       |                         |      |
| 26            | 4                 | 15             | 2.5            | 5                            | 0.62                             | -3.61                 | -3.68                   | 1.9  |
| 27            | 4                 | 15             | 2.5            | 10                           | 0.93                             | -3.57                 | -3.68                   | 3.1  |
| 28            | 7                 | 8              | 1              | 1                            | 0.69                             | -1.42                 | -1.52                   | 6.8  |
| 29            | 7                 | 8              | 1              | 5                            | 2.31                             | -1.34                 | -1.52                   | 13.7 |
| 30            | 7                 | 8              | 1              | 10                           | 2.92                             | -1.33                 | -1.52                   | 14.6 |
| 31            | 7                 | 8              | 2              | 1                            | 0.49                             | -1.44                 | -1.52                   | 5.3  |
| 32            | 7                 | 8              | 2              | 5                            | 2.06                             | -1.36                 | -1.52                   | 12.1 |
| 33            | 7                 | 8              | 2              | 10                           | 2.72                             | -1.35                 | -1.52                   | 12.9 |
| 34            | 7                 | 8              | 2.5            | 1                            |                                  |                       |                         |      |
| 35            | 7                 | 8              | 2.5            | 5                            | 1.94                             | -1.36                 | -1.52                   | 11.4 |
| 36            | 7                 | 8              | 2.5            | 10                           | 2.61                             | -1.35                 | -1.52                   | 12.3 |
| 37            | 7                 | 10             | 1              | 1                            | 0.62                             | -1.43                 | -1.52                   | 6.2  |
| 38            | 7                 | 10             | 1              | 5                            | 2.16                             | -1.33                 | -1.52                   | 14.1 |
| 39            | 7                 | 10             | 1              | 10                           | 2.79                             | -1.32                 | -1.52                   | 15.2 |
| 40            | 7                 | 10             | 2              | 1                            | 0.45                             | -1.45                 | -1.52                   | 4.7  |
| 41            | 7                 | 10             | 2              | 5                            | 1.91                             | -1.35                 | -1.52                   | 12.3 |
| 42            | 7                 | 10             | 2              | 10                           | 2.58                             | -1.34                 | -1.52                   | 13.4 |
| 43            | 7                 | 10             | 2.5            | 1                            |                                  |                       |                         |      |
| 44            | 7                 | 10             | 2.5            | 5                            | 1.79                             | -1.36                 | -1.52                   | 11.5 |
| 45            | 7                 | 10             | 2.5            | 10                           | 2.46                             | -1.35                 | -1.52                   | 12.7 |
| 46            | 7                 | 15             | 1              | 1                            | 0.56                             | -1.44                 | -1.52                   | 5.2  |
| 47            | 7                 | 15             | 1              | 5                            | 1.89                             | -1.33                 | -1.52                   | 14.5 |
| 48            | 7                 | 15             | 1              | 10                           | 2.54                             | -1.31                 | -1.52                   | 16.1 |
| 49            | 7                 | 15             | 2              | 1                            | 0.42                             | -1.46                 | -1.52                   | 3.9  |
| 50            | 7                 | 15             | 2              | 5                            | 1.66                             | -1.35                 | -1.52                   | 12.3 |
| 51            | 7                 | 15             | 2              | 10                           | 2.32                             | -1.33                 | -1.52                   | 14.0 |
| 52            | 7                 | 15             | 2.5            | 1                            |                                  |                       |                         |      |
| 53            | 7                 | 15             | 2.5            | 5                            | 1.55                             | -1.36                 | -1.52                   | 11.5 |
| 54            | 7                 | 15             | 2.5            | 10                           | 2.20                             | -1.34                 | -1.52                   | 13.2 |
| 55            | 15                | 8              | 1              | 1                            | 1.83                             | -0.20                 | -0.31                   | 53.8 |
| 56            | 15                | 8              | 1              | 5                            | 2.58                             | -0.19                 | -0.32                   | 67.3 |
| 57            | 15                | 8              | 1              | 10                           | 2.81                             | -0.19                 | -0.32                   | 67.0 |
| 58            | 15                | 8              | 2              | 1                            | 1.82                             | -0.20                 | -0.31                   | 53.2 |
| 59            | 15                | 8              | 2              | 5                            | 2.56                             | -0.19                 | -0.32                   | 66.5 |
| 60            | 15                | 8              | 2              | 10                           | 2.77                             | -0.19                 | -0.32                   | 65.6 |
| 61            | 15                | 8              | 2.5            | 1                            | 1.80                             | -0.20                 | -0.31                   | 52.2 |
| 62            | 15                | 8              | 2.5            | 5                            | 2.55                             | -0.19                 | -0.32                   | 66.0 |
| 63            | 15                | 8              | 2.5            | 10                           | 2.75                             | -0.19                 | -0.32                   | 65.0 |
| 64            | 15                | 10             | 1              | 1                            | 1.79                             | -0.20                 | -0.31                   | 52.1 |
| 65            | 15                | 10             | 1              | 5                            | 2.60                             | -0.19                 | -0.32                   | 69.5 |
| 66            | 15                | 10             | 1              | 10                           | 2.86                             | -0.19                 | -0.32                   | 70.4 |
| 67            | 15                | 10             | 2              | 1                            | 1.78                             | -0.20                 | -0.31                   | 51.1 |
| 68            | 15                | 10             | 2              | 5                            | 2.58                             | -0.19                 | -0.32                   | 68.0 |
| 69            | 15                | 10             | 2              | 10                           | 2.82                             | -0.19                 | -0.32                   | 68.6 |
| 70            | 15                | 10             | 2.5            | 1                            | 1.76                             | -0.20                 | -0.31                   | 50.1 |
| 71            | 15                | 10             | 2.5            | 5                            | 2.58                             | -0.19                 | -0.32                   | 67.2 |
| 72            | 15                | 10             | 2.5            | 10                           | 2.80                             | -0.19                 | -0.32                   | 67.7 |
| 73            | 15                | 15             | 1              | 1                            | 1.69                             | -0.21                 | -0.30                   | 47.2 |
| 74            | 15                | 15             | 1              | 5                            | 2.62                             | -0.19                 | -0.32                   | 71.9 |
| 75            | 15                | 15             | 1              | 10                           | 2.91                             | -0.18                 | -0.32                   | 74.4 |
| 76            | 15                | 15             | 2              | 1                            | 1.67                             | -0.21                 | -0.30                   | 45.8 |
| 77            | 15                | 15             | 2              | 5                            | 2.61                             | -0.19                 | -0.32                   | 69.3 |
| 78            | 15                | 15             | 2              | 10                           | 2.88                             | -0.19                 | -0.32                   | 71.6 |
| 79            | 15                | 15             | 2.5            | 1                            | 1.66                             | -0.21                 | -0.30                   | 45.1 |
| 80            | 15                | 15             | 2.5            | 5                            | 2.60                             | -0.19                 | -0.32                   | 67.9 |
| 81            | 15                | 15             | 2.5            | 10                           | 2.87                             | -0.19                 | -0.32                   | 70.1 |
