# Supplementary material for: Biologically-Directed Modeling Reflects Cytolytic Clearance of SIV-Infected Cells In Vivo in Macaques
Source: PubMed Central journal article supplement (PMC3441463; doi:10.1371/journal.pone.0044778), 2012-09-13
Supplement: pone.0044778.s003.pdf [file pone.0044778.s003.pdf]

### Early Phase

| CD8+ Lymphocyte-Depleted |          |                          |       |       |                          |       | Non-Depleted Controls |          |                          |       |       |                          |       |
|--------------------------|----------|--------------------------|-------|-------|--------------------------|-------|-----------------------|----------|--------------------------|-------|-------|--------------------------|-------|
| Animal                   | $\delta$ | 95% Confidence Interval* |       | $\mu$ | 95% Confidence Interval* |       | Animal                | $\delta$ | 95% Confidence Interval* |       | $\mu$ | 95% Confidence Interval* |       |
|                          |          | Lower                    | Upper |       | Lower                    | Upper |                       |          | Lower                    | Upper |       | Lower                    | Upper |
| RRf6                     | 1.15     | 1.00                     | 1.34  | 0.40  | 0.26                     | 0.49  | RMm6                  | 0.73     | 0.67                     | 0.81  |       |                          |       |
| RAj7                     | 0.60     | 0.51                     | 0.71  |       |                          |       | RSq8                  | 1.10     | 0.97                     | 1.28  | 0.05  | 0.00                     | 0.09  |
| RLi6                     | 1.22     | 1.03                     | 1.46  | 0.22  | 0.13                     | 0.30  | RUe7                  | 1.64     | 1.49                     | 1.78  | 0.13  | 0.10                     | 0.15  |
| RPP6                     | 0.74     | 0.45                     | 1.50  |       |                          |       | RWf7                  | 0.69     | 0.54                     | 0.90  | 0.18  | 0.04                     | 0.26  |
| RZI5                     | 1.22     | 1.03                     | 1.43  | 0.23  | 0.18                     | 0.28  | XHB                   | 1.07     | 0.91                     | 1.23  | 0.13  | 0.07                     | 0.17  |
| Mean                     | 0.99     |                          |       | 0.28  |                          |       | Mean                  | 1.05     |                          |       | 0.12  |                          |       |
| sd                       | 0.29     |                          |       | 0.10  |                          |       | sd                    | 0.38     |                          |       | 0.05  |                          |       |

### Late Phase

| CD8+ Lymphocyte-Depleted |          |                          |       |       |                          |       | Non-Depleted Controls |          |                          |       |       |                          |       |
|--------------------------|----------|--------------------------|-------|-------|--------------------------|-------|-----------------------|----------|--------------------------|-------|-------|--------------------------|-------|
| Animal                   | $\delta$ | 95% Confidence Interval* |       | $\mu$ | 95% Confidence Interval* |       | Animal                | $\delta$ | 95% Confidence Interval* |       | $\mu$ | 95% Confidence Interval* |       |
|                          |          | Lower                    | Upper |       | Lower                    | Upper |                       |          | Lower                    | Upper |       | Lower                    | Upper |
| RSq8                     | 1.99     | 1.56                     | 2.62  | 0.20  | 0.17                     | 0.23  | RRf6                  | 1.51     | 0.98                     | 3.39  | 0.40  | 0.00                     | 0.57  |
| RUe7                     | 0.92     | 0.53                     | 2.10  | 0.03  | 0.00                     | 0.19  | RAj7                  | 1.16     | 0.83                     | 1.70  | 0.10  | 0.01                     | 0.17  |
| RWf7                     | 0.92     | 0.52                     | 1.48  | 0.12  | 0.06                     | 0.16  | RLi6                  | 0.92     | 0.70                     | 1.17  | 0.16  | 0.13                     | 0.20  |
| XHB                      | 1.15     | 0.90                     | 1.57  | 0.10  | 0.02                     | 0.18  |                       |          |                          |       |       |                          |       |
| Mean                     | 1.25     |                          |       | 0.11  |                          |       | Mean                  | 1.20     |                          |       | 0.22  |                          |       |
| sd                       | 0.51     |                          |       | 0.07  |                          |       | sd                    | 0.30     |                          |       | 0.16  |                          |       |

\*Confidence intervals computed from 500 bootstrap replicates

| Depletion: | $\delta$ | $\delta$ | % $\Delta$ |
|------------|----------|----------|------------|
|            | N        | Y        |            |
| RAj7       | 1.16     | 0.60     | -48.3%     |
| RLi6       | 0.92     | 1.22     | 32.6%      |
| RMm6       | 0.73     |          |            |
| RPP6       |          | 0.74     |            |
| RRf6       | 1.51     | 1.15     | -23.8%     |
| RSq8       | 1.10     | 1.99     | 80.9%      |
| RUe7       | 1.64     | 0.92     | -43.9%     |
| RWf7       | 0.69     | 0.92     | 33.3%      |
| RZI5       |          | 1.22     |            |
| XHB        | 1.07     | 1.15     | 7.5%       |

|       |      |        |
|-------|------|--------|
| EARLY | mean | -13.2% |
|       | s.d. | 41.5%  |
| LATE  | mean | 19.5%  |
|       | s.d. | 52.0%  |
| ALL   | mean | 5.5%   |
|       | s.d. | 47.2%  |
